# Supplementary material
Source: ML conference proceedings conference paper supplement (https://openaccess.thecvf.com/content/ICCV2025/html/Zheng_CULTURE3D_A_Large-Scale_ICCV_2025_paper.html)
Supplement: Supplementary file 1 [file Zheng_CULTURE3D_A_Large-Scale_ICCV_2025_supplemental.pdf]

# CULTURE3D: A Large-Scale and Diverse Dataset of Cultural Landmarks and Terrains for Gaussian-Based Scene Rendering

## Supplementary File

**Buckingham Palace Dataset** The Buckingham Palace dataset captures detailed architectural elements of the palace, such as the entrance gate and sculptural decorations, and intricate facade designs. This dataset collected using UAV-based photogrammetry, ensures high-fidelity 3D modeling suitable for digital preservation, restoration planning and virtual tourism.

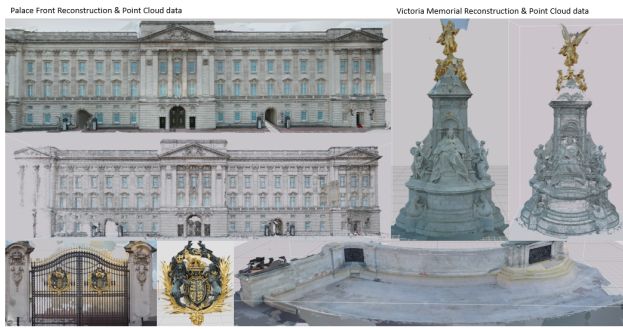

Figure 1. Buckingham Palace Dataset

**Cambridge Campus** The Cambridge dataset offers a detailed reconstruction of several famous sections among the campus, including its major buildings, pathways and open spaces. This dataset is ideal for creating VR campus tours, academic simulations due to its high-resolution source images.

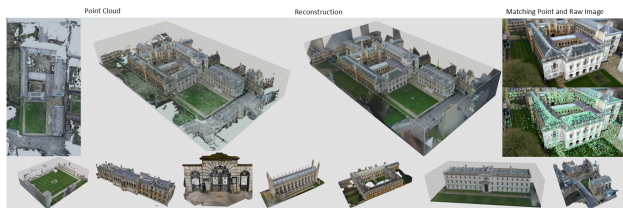

Figure 2. Cambridge Campus

**Egyptian Pyramids and Sphinx Dataset** The Egyptian Pyramids and Sphinx dataset provides a highly detailed re-

construction of these ancient structures. The combination of aerial and ground-level imagery makes it suitable for virtual reality applications and archaeological research.

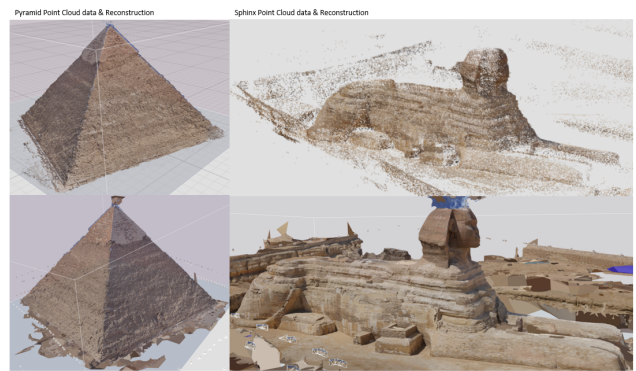

Figure 3. Egyptian Pyramids and Sphinx Dataset

**Louvre Museum Dataset** The Louvre Museum dataset focuses on both exterior and interior of the museum, including staircases, ornate carvings, arches, and stone masonry. Reconstructed by high-resolution images makes it particularly valuable for research in architectural modeling, heritage conservation, and the creation of immersive virtual reality experiences.

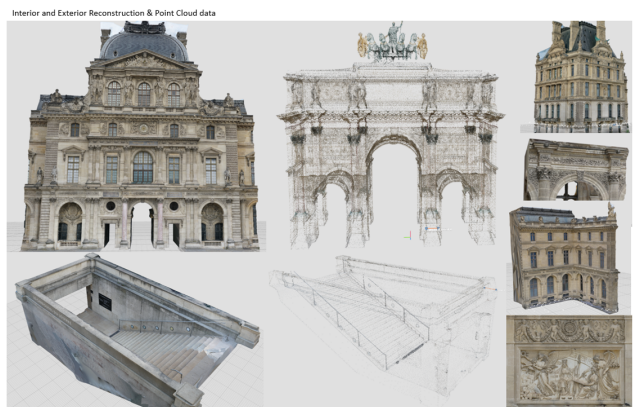

Figure 4. Louvre Museum Dataset

**Leaning Tower of Pisa Dataset** The Leaning Tower of Pisa dataset offers a detailed reconstruction of the whole Italy most famous architectures, including Leaning Tower of Pisa, main Cathedral and the surrounding buildings. The dataset serves multiple applications, including structural analysis for assessing stability, realistic VR simulations for educational purposes.

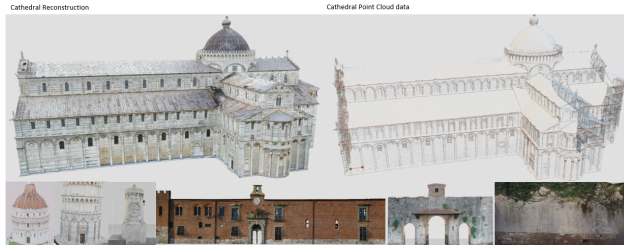

Figure 5. Leaning Tower of Pisa Dataset

**Stonehenge Dataset** The Stonehenge dataset captures the unique spatial arrangement of the monument's stones, emphasizing their unique spatial arrangement and intricate shapes. The 3D model preserves the structure's geometry, making it a ready-to-use resource for archaeological research, virtual reality applications, and

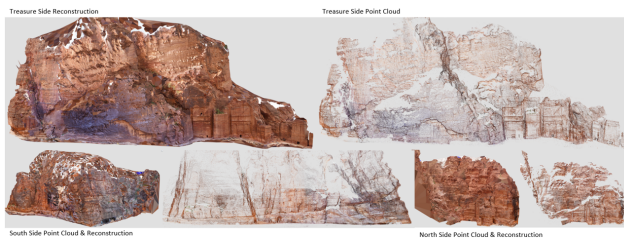

Figure 6. Petra Dataset

**Petra Dataset** The Petra dataset offers a detailed reconstruction of both the natural stone formations and the surrounding environment, capturing the complexity of the iconic stones along with the natural landscape.

**Trafalgar Square** The Trafalgar Square dataset features detailed models of iconic statues and the surrounding structures within the square. The high-resolution models captured are particularly useful for cultural preservation, virtual exploration, and landmark preservation.

**National Art Gallery Dataset** The National Art Gallery dataset captures the entirety of the gallery's interior, including detailed representations of paintings, sculptures, and architectural features such as roof patterns. This dataset sup-

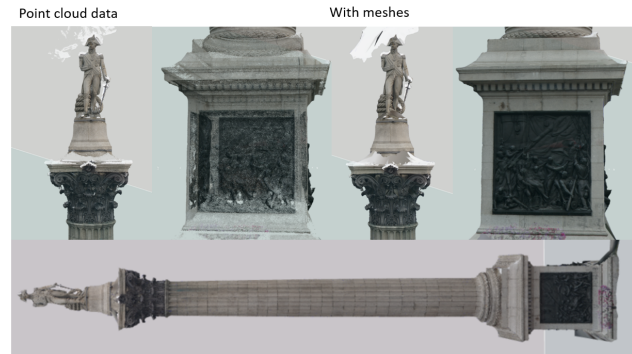

Figure 7. Trafalgar Square

ports artistic preservation, VR experiences, providing valuable data for promoting virtual cultural experiences of this renowned gallery.

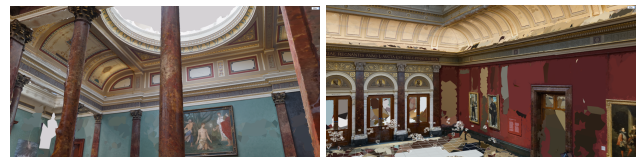

Figure 8. National Art Gallery Dataset

**Forbidden City** The Forbidden City dataset captures key architectural details, including intricate roof patterns, murals, and ornate carvings, which is essential for architectural heritage study, providing researchers with valuable data for analyzing and conserving these historically significant elements.

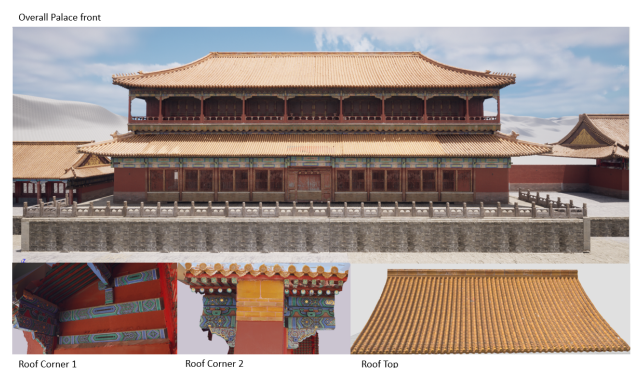

Figure 9. Forbidden City

**Longmen Grottoes** The Longmen Grottoes dataset features detailed intricate carvings and the impact of natural and cultural elements on their structure, which is suitable

for both cultural preservation and environmental analysis, capturing the effects of natural weathering over time.

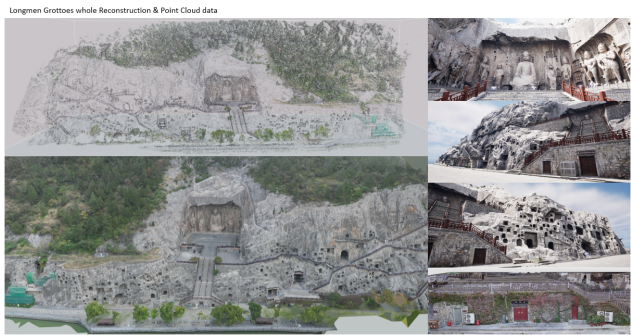

Figure 10. Longmen Grottoes

| GPU | Dataset           | Gaussian Primitives | GPU Memory |
|-----|-------------------|---------------------|------------|
| 0   | Graduation Square | 9,423,830           | 48,841MiB  |
| 1   | Pyramid           | 14,574,327          | 47,838MiB  |
| 2   | Trinity St        | 3,798,176           | 38,196MiB  |
| 3   | Petra             | 2,455,325           | 33,522MiB  |
| 4   | Gallery           | 894,017             | 27,836MiB  |

Table 1. Quantitative metrics for different datasets and GPUs.

| Method/Scene    | Cambridge Graduation Square                                                         | Cambridge Trinity St East                                                           | Pyramid and Sphinx                                                                   | Petra Treasury Face                                                                   | National Gallery Hall 36                                                              |
|-----------------|-------------------------------------------------------------------------------------|-------------------------------------------------------------------------------------|--------------------------------------------------------------------------------------|---------------------------------------------------------------------------------------|---------------------------------------------------------------------------------------|
| Ground Truth    |    |    |    |    |    |
| Reality Capture |    |    |    |    |    |
| 3DGS            |   |   |   |   |   |
| SuGaR           | OOM                                                                                 |  |  |  |  |
| Wild Gaussian   | OOM                                                                                 |  | OOM                                                                                  |  | FAIL                                                                                  |
| GOF             |  |  | FAIL                                                                                 |  |  |

Table 2. Comparison of 3D scene representations across different methods.
